# Supplementary material for: Matching of array CGH and gene expression microarray features for the purpose of integrative genomic analyses
Source: Springer Nature journal article supplement (doi:10.1186/1471-2105-13-80), 2012-05-04

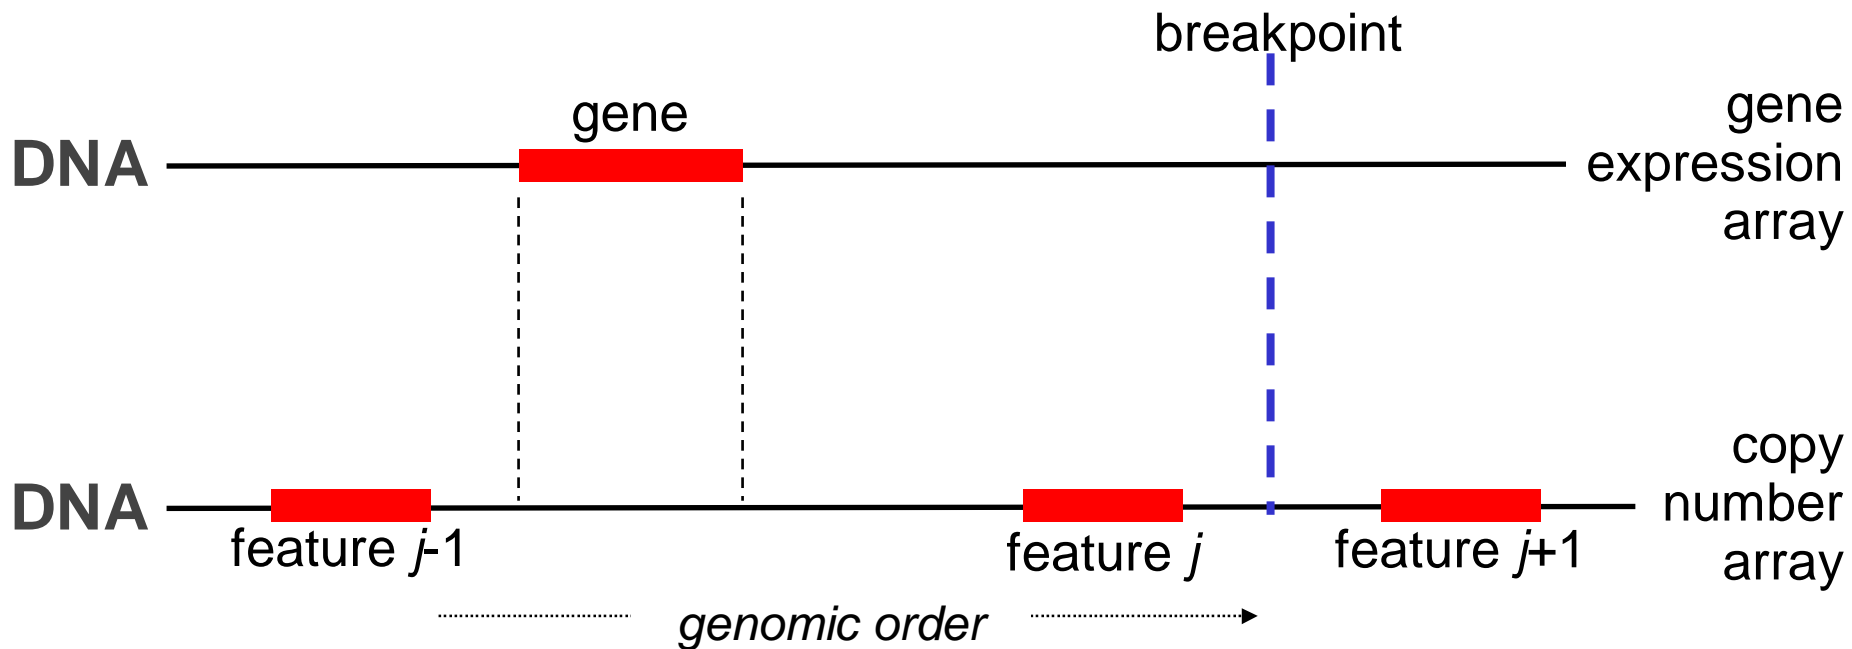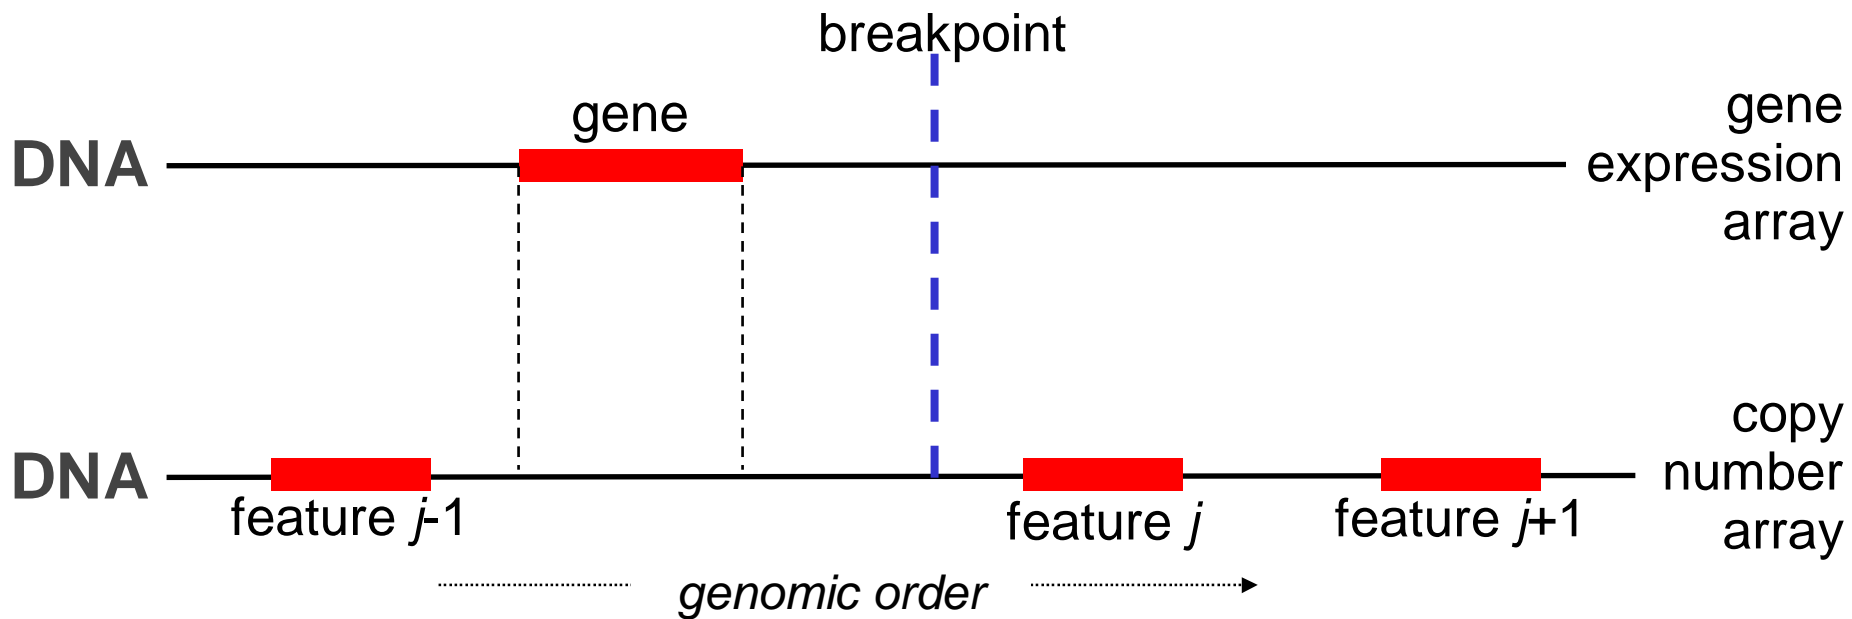

Supplement: 12859_2011_5399_MOESM6_ESM.pdf [file 12859_2011_5399_MOESM6_ESM.pdf]
