# Supplementary material for: Matching of array CGH and gene expression microarray features for the purpose of integrative genomic analyses
Source: Springer Nature journal article supplement (doi:10.1186/1471-2105-13-80), 2012-05-04
Supplement: 12859_2011_5399_MOESM9_ESM.pdf [file 12859_2011_5399_MOESM9_ESM.pdf]

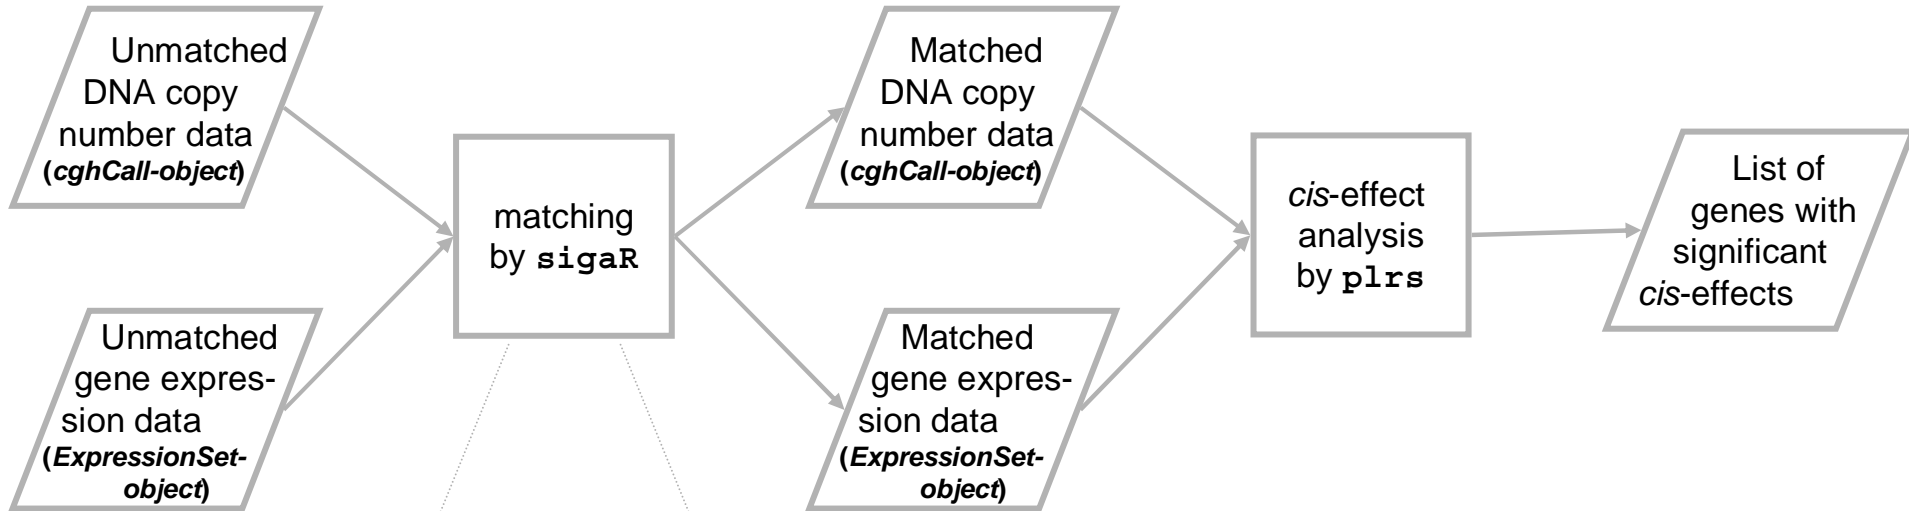

**sigar**

- Search for DNA copy number probes that are (in some sense) close to gene expression probes.
- Summarize the data of the DNA copy number probes that match to the same gene expression probe.
